# Supplementary material for: Ospemifene displays broad-spectrum synergistic interactions with itraconazole through potent interference with fungal efflux activities
Source: PubMed Central journal article supplement (PMC7142066; doi:10.1038/s41598-020-62976-y), 2020-04-08
Supplement: 41598_2020_62976_MOESM1_ESM.pdf [file 41598_2020_62976_MOESM1_ESM.pdf]

**Ospemifene displays broad-spectrum synergistic interactions with itraconazole through potent interference with fungal efflux activities**

Hassan E. Eldesouky<sup>1</sup>, Ehab A. Salama<sup>1</sup>, Tony R. Hazbun<sup>2,3</sup>, Abdelrahman S. Mayhoub<sup>4\*</sup> and Mohamed N. Seleem<sup>1,5\*</sup>

<sup>1</sup>Department of Comparative Pathobiology, College of Veterinary Medicine, Purdue University, West Lafayette, IN 47907, USA

<sup>2</sup>Department of Medicinal Chemistry and Molecular Pharmacology, College of Pharmacy, Purdue University, West Lafayette, Indiana 47907, USA

<sup>3</sup>Bindley Bioscience Center, Purdue University, West Lafayette, Indiana 47906, USA

<sup>4</sup>University of Science and Technology, Nanoscience Program, Zewail City of Science and Technology, October Gardens, 6th of October, Giza 12578, Egypt.

<sup>5</sup>Purdue Institute of Inflammation, Immunology, and Infectious Disease, Purdue University, West Lafayette, IN 47907, USA

\*Correspondence:

[mseleem@purdue.edu](mailto:mseleem@purdue.edu)

**Supplementary Table 1. Source and description of the fungal strains used in this study.**

| Fungal Strains                            | Source                                                        | Description                                                                                                                                                       |
|-------------------------------------------|---------------------------------------------------------------|-------------------------------------------------------------------------------------------------------------------------------------------------------------------|
| <i>C. albicans</i> SC5314                 | ATCC                                                          | Wild-type strain                                                                                                                                                  |
| <i>C. albicans</i> NR-29448               | BEI Resources                                                 | A fluconazole-resistant bloodstream isolate (Arizona, USA)                                                                                                        |
| <i>C. albicans</i> NR-29437               | BEI Resources                                                 | Fluconazole-resistant bloodstream isolate (China)                                                                                                                 |
| <i>C. albicans</i> ATCC 26790             | ATCC                                                          | A fluconazole-resistant strain isolated from a patient with pulmonary candidiasis                                                                                 |
| <i>C. albicans</i> ATCC MYA-573           | ATCC                                                          | A fluconazole-resistant bloodstream isolate (from an AIDS patient in Germany)                                                                                     |
| <i>C. albicans</i> TWO7241                | Professor Theodore White (University of Missouri-Kansas City) | A fluconazole-resistant clinical isolate that has increased efflux activity ( <i>MDR1</i> overexpression) and overexpression of the azole target ( <i>ERG11</i> ) |
| <i>C. albicans</i> TWO7243                |                                                               | Fluconazole- and itraconazole-resistant clinical isolate that has increased mRNA levels of <i>CDR1</i> , <i>MDR1</i> , and <i>ERG11</i>                           |
| <i>C. albicans</i> SCTAC <sup>1R34A</sup> | Professor David Rogers (University of Tennessee)              | A mutant strain having a gain-of-function homozygous mutation in <i>TAC1</i>                                                                                      |
| <i>C. albicans</i> SCMR <sup>1R34A</sup>  |                                                               | A mutant strain having a gain-of-function homozygous mutation in <i>MRR1</i>                                                                                      |
| <i>C. glabrata</i> ATCC 66032             | ATCC                                                          | Not available                                                                                                                                                     |
| <i>C. glabrata</i> ATCC MYA-2950          | ATCC                                                          | Not available                                                                                                                                                     |
| <i>C. glabrata</i> ATCC 2001              | ATCC                                                          | A clinical isolate from human intestinal fluid                                                                                                                    |
| <i>C. glabrata</i> HM-1123                | BEI-Resources                                                 | A clinical isolate from the bronchi of a human patient (Missouri, USA)                                                                                            |
| <i>C. auris</i> 385                       | CDC                                                           | Resistant to fluconazole, itraconazole, voriconazole, and amphotericin B                                                                                          |
| <i>C. auris</i> 386                       | CDC                                                           | Resistant to fluconazole, voriconazole, and amphotericin B                                                                                                        |
| <i>C. auris</i> 388                       | CDC                                                           | Resistant to fluconazole, itraconazole, voriconazole, and amphotericin B                                                                                          |
| <i>C. auris</i> 389                       | CDC                                                           | Resistant to fluconazole, itraconazole, voriconazole, and amphotericin B                                                                                          |
| <i>C. auris</i> 390                       | CDC                                                           | Resistant to fluconazole, itraconazole, and amphotericin B                                                                                                        |

|                                |                                                                   |                                                                                                            |
|--------------------------------|-------------------------------------------------------------------|------------------------------------------------------------------------------------------------------------|
| <i>C. neoformans</i> NR-41291  | BEI Resources                                                     | A clinical isolate of human cerebrospinal fluid was identified in July 2011 (China)                        |
| <i>C. neoformans</i> NR-41295  | BEI Resources                                                     | A Fluconazole-resistant human cerebrospinal fluid clinical isolate was identified in February 2012 (China) |
| <i>C. neoformans</i> NR-41298  | BEI Resources                                                     | A clinical isolate obtained in February 2012 from human cerebrospinal fluid (China)                        |
| <i>A. fumigatus</i> NR-35304   | BEI-Resources                                                     | A clinical isolate identified in 1998 from human sputum tracheal suction in California, USA                |
| <i>A. fumigatus</i> NR-35312   | BEI Resources                                                     | An environmental isolate was identified in 2002 (Montréal, Québec, Canada)                                 |
| <i>A. fumigatus</i> NR-35302   | BEI Resources                                                     | Clinical isolate obtained in 1998 from peritoneal fluid of a human patient in California, USA              |
| <i>S. cerevisiae</i> AD/CaCDR1 | Professor Richard D. Cannon<br>(University of Otago, New Zealand) | Recombinant <i>S. cerevisiae</i> strain overexpressing <i>CDR1</i> from <i>C. albicans</i>                 |
| <i>S. cerevisiae</i> AD/CaCDR2 |                                                                   | Recombinant <i>S. cerevisiae</i> strain overexpressing <i>CDR2</i> from <i>C. albicans</i>                 |
| <i>S. cerevisiae</i> AD/CaMDR1 |                                                                   | Recombinant <i>S. cerevisiae</i> strain overexpressing <i>MDR1</i> from <i>C. albicans</i>                 |

**Supplementary Table 2. Effect of ospemifene-fluconazole (FLC) combination against different fungal strains.**

| Fungal Strains                              | MIC ( $\mu\text{g/ml}$ ) |          |            |          | $\Sigma\text{FICI}^1$ | Interaction |
|---------------------------------------------|--------------------------|----------|------------|----------|-----------------------|-------------|
|                                             | FLC                      |          | Ospemifene |          |                       |             |
|                                             | Alone                    | Combined | Alone      | Combined |                       |             |
| <i>C. albicans</i> SC5314                   | 0.125                    | 0.125    | > 256      | 4        | 1.02                  | IND         |
| <i>C. albicans</i> NR-29448                 | 256                      | 4        |            | 2        | 0.02                  | SYN         |
| <i>C. albicans</i> NR-29437                 | 128                      | 4        |            | 4        | 0.05                  | SYN         |
| <i>C. albicans</i> ATCC MYA 573             | 128                      | 128      |            | 4        | 1.02                  | IND         |
| <i>C. albicans</i> TWO7241                  | 32                       | 32       |            | 4        | 1.02                  | IND         |
| <i>C. albicans</i> TWO7243                  | 64                       | 64       |            | 4        | 1.02                  | IND         |
| <i>C. albicans</i> SC-TAC1 <sup>G980E</sup> | 2                        | 2        |            | 4        | 1.02                  | IND         |
| <i>C. albicans</i> SC-MRR1 <sup>P683S</sup> | 2                        | 2        |            | 4        | 1.02                  | IND         |
| <i>C. glabrata</i> ATCC 66032               | 4                        | 4        |            | 4        | 1.02                  | IND         |
| <i>C. glabrata</i> ATCC MYA-2950            | 8                        | 8        |            | 4        | 1.02                  | IND         |
| <i>C. glabrata</i> ATCC 2001                | 4                        | 4        |            | 4        | 1.02                  | IND         |
| <i>C. glabrata</i> HM-1123                  | 4                        | 4        |            | 4        | 1.02                  | IND         |
| <i>C. auris</i> 385                         | 256                      | 256      |            | 4        | 1.02                  | IND         |
| <i>C. auris</i> 386                         | 256                      | 256      |            | 4        | 1.02                  | IND         |
| <i>C. auris</i> 388                         | 256                      | 256      |            | 4        | 1.02                  | IND         |
| <i>C. auris</i> 389                         | 256                      | 256      |            | 4        | 1.02                  | IND         |
| <i>C. auris</i> 390                         | 256                      | 256      |            | 4        | 1.02                  | IND         |
| <i>C. neoformans</i> NR-41291               | 8                        | 1        |            | 0.5      | 0.13                  | SYN         |
| <i>C. neoformans</i> NR-41295               | 8                        | 4        |            | 1        | 0.50                  | SYN         |
| <i>C. neoformans</i> NR-41298               | 2                        | 0.5      |            | 0.5      | 0.25                  | SYN         |
| <i>A. fumigatus</i> NR-35304                | > 256                    | > 256    | 4          | 1.02     | IND                   |             |
| <i>A. fumigatus</i> NR-35312                | > 256                    | > 256    | 4          | 1.02     | IND                   |             |
| <i>A. fumigatus</i> NR-35302                | > 256                    | > 256    | 4          | 1.02     | IND                   |             |

<sup>1</sup>  $\Sigma\text{FICI}$  (fractional inhibitory concentration index) values, rounded to the nearest two decimal places, were used to measure the interaction between the tested combinations.  $\Sigma\text{FICI}$  interpretation corresponded to the following definitions: synergism (SYN),  $\Sigma\text{FICI} \leq 0.50$ ; additivity (ADD),  $\Sigma\text{FICI} > 0.50$  and  $\leq 1$ ; and indifference (IND),  $\Sigma\text{FICI} > 1$  and  $\leq 4$ .

**Supplementary Table 3. Effect of ospemifene-voriconazole (VRC) combination against different fungal strains.**

| Fungal Strains                   | MIC ( $\mu\text{g/ml}$ ) |          |            |          | $\Sigma\text{FICI}^*$ | Interaction |
|----------------------------------|--------------------------|----------|------------|----------|-----------------------|-------------|
|                                  | VRC                      |          | Ospemifene |          |                       |             |
|                                  | Alone                    | Combined | Alone      | Combined |                       |             |
| <i>C. albicans</i> SC5314        | 0.031                    | 0.031    | > 256      | 4        | 1.02                  | IND         |
| <i>C. albicans</i> NR-29448      | 4                        | 0.125    |            | 8        | 0.06                  | SYN         |
| <i>C. albicans</i> NR-29437      | 0.125                    | 0.015    |            | 4        | 0.14                  | SYN         |
| <i>C. albicans</i> ATCC MYA 573  | 0.25                     | 0.25     |            | 4        | 1.02                  | IND         |
| <i>C. albicans</i> TWO7241       | 0.125                    | 0.062    |            | 1        | 0.50                  | SYN         |
| <i>C. albicans</i> TWO7243       | 0.50                     | 0.50     |            | 4        | 1.02                  | IND         |
| <i>C. albicans</i> SCTAC1R34A    | 0.062                    | 0.062    |            | 4        | 1.02                  | IND         |
| <i>C. albicans</i> SCMRR1R34A    | 0.015                    | 0.015    |            | 2        | 1.01                  | IND         |
| <i>C. glabrata</i> ATCC 66032    | 0.125                    | 0.125    |            | 2        | 1.02                  | IND         |
| <i>C. glabrata</i> ATCC MYA-2950 | 0.125                    | 0.125    |            | 2        | 1.01                  | IND         |
| <i>C. glabrata</i> ATCC 2001     | 0.062                    | 0.062    |            | 2        | 1.01                  | IND         |
| <i>C. glabrata</i> HM-1123       | 0.062                    | 0.062    |            | 2        | 1.01                  | IND         |
| <i>C. auris</i> 385              | 2                        | 2        |            | 4        | 1.02                  | IND         |
| <i>C. auris</i> 386              | 1                        | 1        |            | 4        | 1.02                  | IND         |
| <i>C. auris</i> 388              | 1                        | 1        |            | 4        | 1.02                  | IND         |
| <i>C. auris</i> 389              | 2                        | 2        |            | 4        | 1.02                  | IND         |
| <i>C. auris</i> 390              | 0.50                     | 0.50     |            | 4        | 1.02                  | IND         |
| <i>C. neoformans</i> NR-41291    | 0.125                    | 0.062    |            | 0.5      | 0.50                  | SYN         |
| <i>C. neoformans</i> NR-41295    | 0.25                     | 0.062    |            | 0.5      | 0.25                  | SYN         |
| <i>C. neoformans</i> NR-41298    | 0.031                    | 0.015    |            | 0.5      | 0.50                  | SYN         |
| <i>A. fumigatus</i> NR-35304     | 0.125                    | 0.125    |            | 4        | 1.02                  | IND         |
| <i>A. fumigatus</i> NR-35312     | 0.125                    | 0.125    |            | 4        | 1.02                  | IND         |
| <i>A. fumigatus</i> NR-35302     | 0.125                    | 0.125    |            | 4        | 1.02                  | IND         |

<sup>1</sup>  $\Sigma\text{FICI}$  (fractional inhibitory concentration index) values, rounded to the nearest two decimal places, were used to measure the interaction between the tested combinations.  $\Sigma\text{FICI}$  interpretation corresponded to the following definitions: synergism (SYN),  $\Sigma\text{FICI} \leq 0.50$ ; additivity (ADD),  $\Sigma\text{FICI} > 0.50$  and  $\leq 1$ ; and indifference (IND),  $\Sigma\text{FICI} > 1$  and  $\leq 4$ .

**Supplementary Table 4. Primers used in this study.**

| Gene        | Protein                                   | GeneBank accession no. | Primer             | Sequence                                                             |
|-------------|-------------------------------------------|------------------------|--------------------|----------------------------------------------------------------------|
| <i>ACT1</i> | Actin                                     | XM_019475182           | Forward<br>Reverse | TTGGTGATGAAGCCCAATCC<br>CATATCGTCCCAGTTGGAAACA                       |
| <i>MDR1</i> | Major facilitator superfamily transporter | XM_714072              | Forward<br>Reverse | TTACCTGAAACTTTTGGCAAACA<br>ACTTGTGATTCTGTCGTTACCG                    |
| <i>CDR1</i> | ABC transporters CDR1                     | XM_718116              | Forward<br>Reverse | TTTAGCCAGAACTTTCATCATGAT<br>T<br>TATTTATTTCTTCATGTTTCATATGG<br>ATTGA |
| <i>CDR2</i> | ABC transporters CDR2                     | XM_718076              | Forward<br>Reverse | GGTATTGGCTGGTCCTAATGTGA<br>GCTTGAATCAAATAAGTGAATGGA<br>TTAC          |

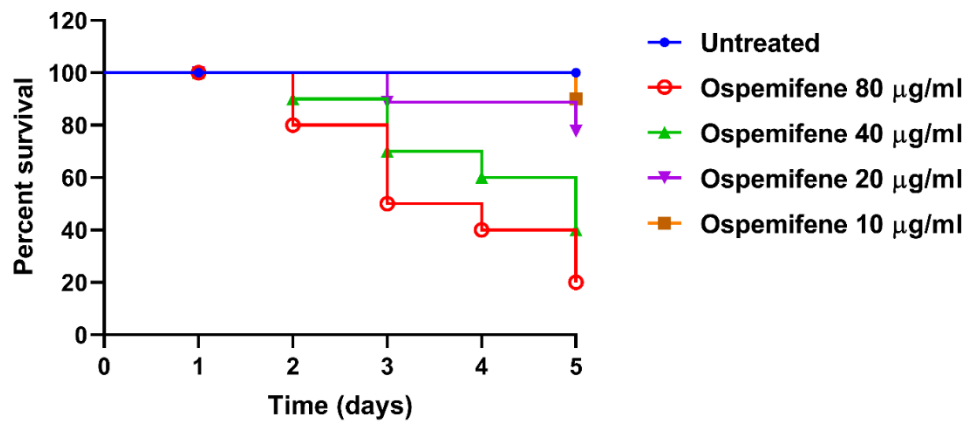

**Supplementary Figure 1.** Toxicity assessment of ospemifene in *C. elegans*. Adult (L4-stage) nematodes were exposed to ospemifene at four different concentrations (80, 40, 20, and 10 μg/ml) and viability was recorded for five consecutive days.

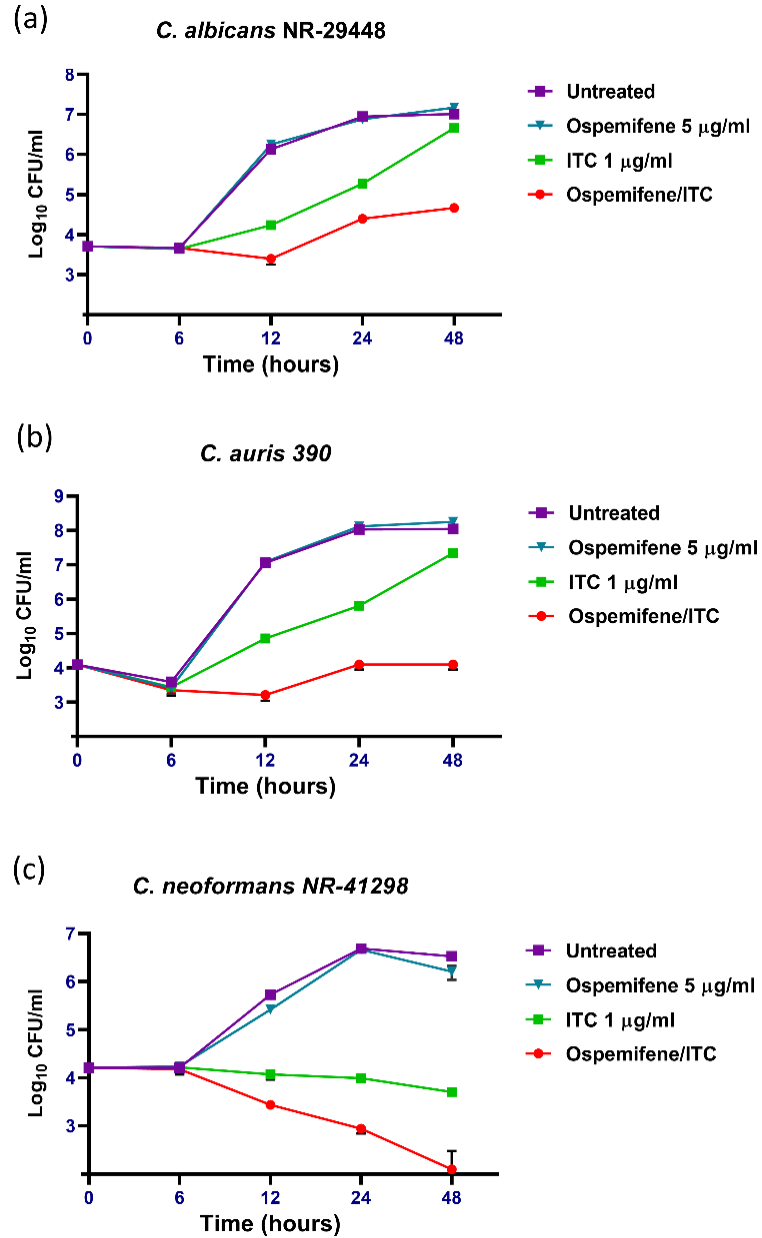

**Supplementary Figure 2.** Time-kill analysis of ospemifene (5 µg/ml), itraconazole (1 µg/ml), or a combination of both. Test agents were evaluated against (a) *C. albicans* NR-29448, (b) *Candida auris* 390, and (c) *C. neoformans* NR-41298 over a 48-hour incubation period at 35 °C. DMSO served as a negative untreated control. Error bars represent standard deviation values.



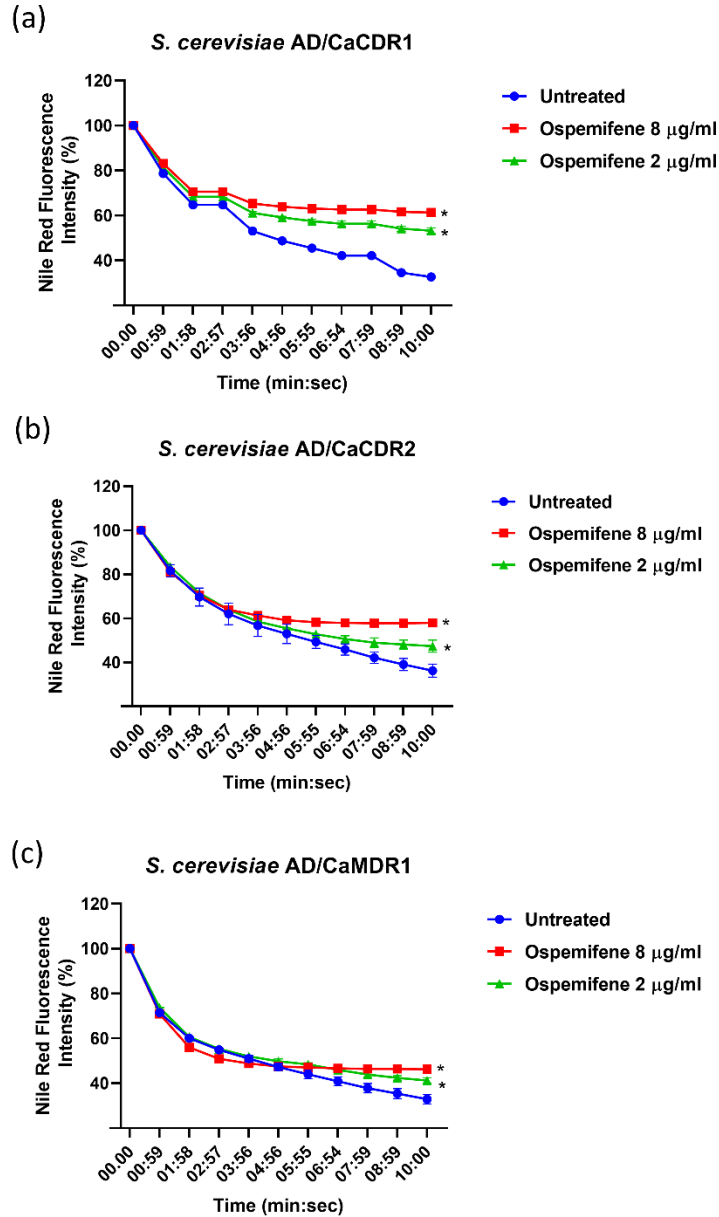

**Supplementary Figure 3. Effect of ospemifene on Nile red efflux by recombinant *Saccharomyces cerevisiae* strains.** Effect of ospemifene on Nile red efflux was evaluated against recombinant *S. cerevisiae* strains (a) Recombinant *S. cerevisiae* AD/CaCDR1 overexpressing *C. albicans* CDR1 (b) Recombinant *S. cerevisiae* AD/CaCDR2 overexpressing *C. albicans* CDR2, and (c) Recombinant *S. cerevisiae* AD/CaMDR1 overexpressing *C. albicans* MDR1. Energy-depleted cells were loaded with Nile red (7.5 µM) and were treated with ospemifene (2, and 8 µg/ml). Efflux was initiated by adding glucose (40 mM) to all treatment groups. The Nile red fluorescence intensity was then monitored over 10 minutes and is expressed as the percentage of change in the fluorescence intensity. (\*) indicates a significant statistical difference in the fluorescence intensity of the treated cells relative to the untreated control ( $P < 0.05$ ), as determined by multiple t-tests using the Holm-Sidak statistical method for multiple comparisons.

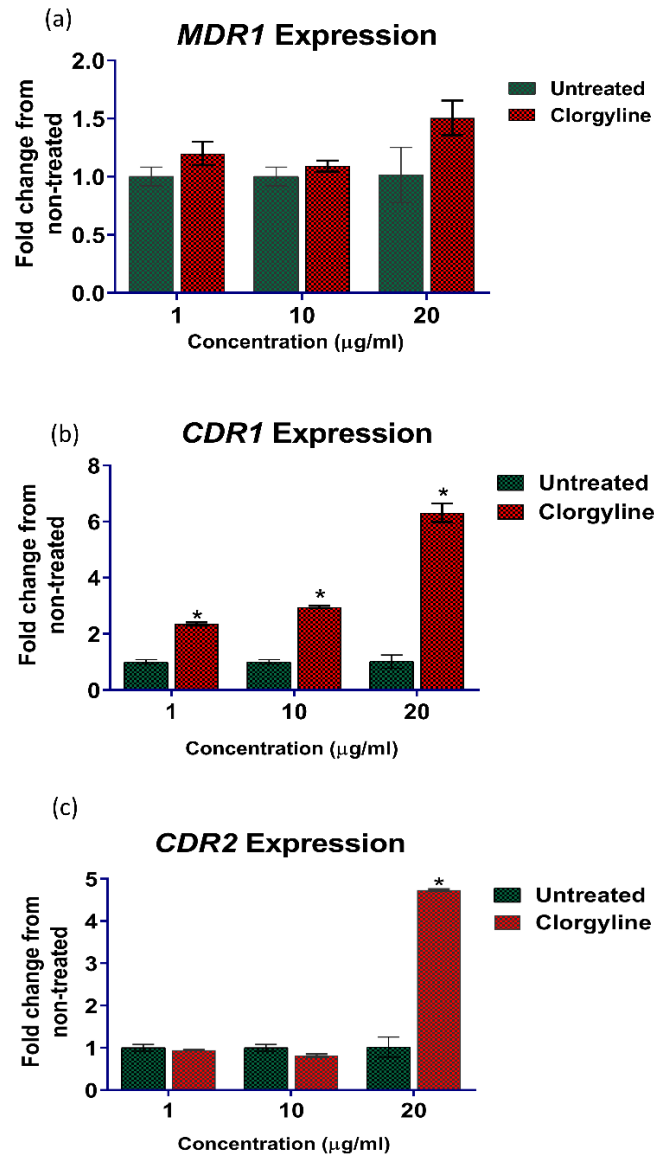

**Supplementary Figure 4.** Effect of clorgyline on the expression of azole resistance-related efflux genes a) *MDR1*, b) *CDR1*, and c) *CDR2*. *C. albicans* SC5314 was treated with either DMSO or ospemifene (1, 10, 20 µg/ml) for 3 h in RPMI 1640 and harvested. The expression of *CDR1*, *CDR2*, and *MDR1* was determined by quantitative RT-PCR. Bars show the mean fold change for ospemifene-treated cells relative to untreated cells, and error bars indicate standard deviations of three biological replicates. \* indicates a significant difference between clorgyline treatments relative to the untreated control ( $P < 0.05$ ), as determined by multiple t-tests using the Holm-Sidak statistical method for multiple comparisons.
